# Supplementary material for: Stabilising the Integrity of Snake Venom mRNA Stored under Tropical Field Conditions Expands Research Horizons
Source: PubMed Central journal article supplement (PMC4900621; doi:10.1371/journal.pntd.0004615), 2016-06-09
Supplement: pntd.0004615.s001.pdf [file pntd.0004615.s001.pdf]

**S1 Table:** Primers for Elapidae PLA<sub>2</sub> (A), KSPI (B), CTL (C) and SVMP (D)

(A) Group 1 phospholipase A2

| List of forward primers | List of reverse primers |
|-------------------------|-------------------------|
| AGCTTCACCACGGACAGATG    | CACTGAAGCCTCTCAAATATCA  |
| TTCACCACGGACAGATG       | AGGTTAGTAACTGCCACCGTC   |
| CAGCTTCACCAGGGACAAAAT   | TTGCGCTGAAGCCTCTCAAATAT |
| ACTCATCTTGCTTGACGCTTCA  | TAATAGAGGCCCGTCCGA      |
| GCAGTTTGTGTCTCCCTCTTA   | GATTGCCTCTCAAATATC      |
|                         | AGAGAATTGCCACGTGCAGGTG  |
|                         | TGCCACAGTCCTTGCGC       |
|                         | AATAGAGGCCCGTCCAGAG     |
|                         | CCTTCTGTTTCACGGGCA      |
|                         | ATCCAGAGAATTGCCACGT     |
|                         | CACTTTATTGTTCAGGAAACGG  |

(B) C-type lectins

| List of forward primers | List of reverse primers |
|-------------------------|-------------------------|
| ACAGGGAAGGAAGGAAGA      | GGTGAGCAAAATCAGACC      |
| AAGGAAGGAAAGAAGACC      |                         |
| TTGCCACTGAGAAGACTTTC    |                         |

(C) Kunitz-type serine protease inhibitors

| List of forward primers | List of reverse primers |
|-------------------------|-------------------------|
| AGAGAGAGAGCTTCATCATGT   | AAACAAAGGAATGAGCCC      |

(D) Snake venom metalloproteinases

| List of forward primers | List of reverse primers |
|-------------------------|-------------------------|
| AGAGCCAGTGGTCCTTCAC     | TCCCATTGTAGCAGTAAC      |
