# Supplementary material for: Stabilising the Integrity of Snake Venom mRNA Stored under Tropical Field Conditions Expands Research Horizons
Source: PubMed Central journal article supplement (PMC4900621; doi:10.1371/journal.pntd.0004615), 2016-06-09
Supplement: pntd.0004615.s002.pdf [file pntd.0004615.s002.pdf]

Elapid\_Venom\_PLA2\_59 1 ?????????????????GAASVRPLPLNLLQFNMIQCTIPTSIPWLDYSNYGCYCGYGG  
Elapid\_Venom\_PLA2\_60 1 ?????????????????RPLPLNLLQFNMIQCTIPTSIPWLDYSNYGCYCGYGG  
Elapid\_Venom\_PLA2\_61 1 ?????????????????PLNLLQFNMIQCTIPTSIPWLDYSNYGCYCGYGG  
Elapid\_Venom\_PLA2\_62 1 ?????????????????PLNLLQFNMIQCTIPTSIPWLDYSNYGCYCGYGG  
Elapid\_Venom\_PLA2\_63 1 ?????????????????PLNLLQFNMIQCTIPTSIPWLDYSNYGCYCGYGG  
Elapid\_Venom\_PLA2\_64 1 ?????????????????PLNLLQFNMIQCTIPTSIPWLDYSNYGCYCGYGG  
Elapid\_Venom\_PLA2\_65 1 ?NPAQLLVLAAVCVSPLGAASIRPMPLNLLQFNMIQCTIPTSIPWLDYSNYGCYCGYGG  
Elapid\_Venom\_PLA2\_66 1 MNPAQLLVLAAVCVSPLGAASIRPMPLNLLQFNMIQCTIPTSIPWLDYSNYGCYCGYGG  
Elapid\_Venom\_PLA2\_67 1 ?NPAQLLVLAAVCVSPLGAASIRPMPLNLLQFNMIQCTIPTSIPWLDYSNYGCYCGYGG  
Elapid\_Venom\_PLA2\_68 1 ?NPAQLLVLAAVCVSLLGASSIRPMPLNLYQFKNMIKCTVPSRS-WWDFADYGCFCGYGG  
Elapid\_Venom\_PLA2\_69 1 ?NPAQLLVLAAVCVSLLGASSIRPMPLNRYQFKNMIKCTVPSRS-WWDFADYGCFCGYGG  
Elapid\_Venom\_PLA2\_70 1 ?????????????GASSTRPMPLNLYQFKNMIKCTVPSRS-WWDFADYGCFCGYGG  
Elapid\_Venom\_PLA2\_71 1 ?NPAQLLVLAAVCVSLLGASSIRPMPLNLYQFKNMIKCTVPSRS-WWDFADYGCFCGYGG  
Elapid\_Venom\_PLA2\_72 1 ?NTAKLLLVLAAVCVSLLGASSIRPMPLNLYQFKNMIKCTVPSRS-WWDFADYGCFCGYGG  
Elapid\_Venom\_PLA2\_73 1 MNPAQLLVLAAVCVSLLGASSIRPMPLNLYQFKNMIKCTVPSRS-WWDFADYGCFCGYGG  
Elapid\_Venom\_PLA2\_74 1 MNPAQLLVLAAVCVSLLGASSIRPMSLNLYQFKNMIKCTVPSRS-WWDFADYGCFCGYGG  
Elapid\_Venom\_PLA2\_75 1 ?NPAQLLVLAAVCVSLFGASSIRPMPLNLYQFKNMIKCTVPSRS-WWDFADYGCFCGYGG  
Elapid\_Venom\_PLA2\_76 1 ?NPAQLLVLTAVCVSLLGASSIRPMPLNLYQFKNMIKCTVPSRS-WWDFADYGCFCGYGG  
Elapid\_Venom\_PLA2\_77 1 ?NPAQLLVLAAVCVSLLGASSIRPTPLNLYQFKNMIKCTVPSRS-WWDFADYGCFCGYGG  
Elapid\_Venom\_PLA2\_78 1 MNPAQLLVLAAVCVSLLGASSVRPMPLNLYQFKNMIKCTVPSRS-WWDFADYGCFCGYGG  
Elapid\_Venom\_PLA2\_79 1 MNPAQLLVLAAVCVSLLGASSIRPMPLNLYQFKNMIKCTVPSRS-WWDFADYGCFCGYGG  
Elapid\_Venom\_PLA2\_80 1 ?????????VCVSLGASSIRPMPLNLYQFKNMIKCTVPSRS-WWDSADYGCFCGYGG  
Elapid\_Venom\_PLA2\_81 1 ?????????GASSIRPMPLNLYQFKNMIKCTVPSRS-WWDFADYGCFCGYGG  
Elapid\_Venom\_PLA2\_82 1 MNPAQLLVLAAVCVSLLGASSIRPMPLNLYQFKNMIKCTVPSRS-WWDFADYGCFCGYGG  
Elapid\_Venom\_PLA2\_83 1 ?NPAQLLVLAAVCVSLLGASSIRPMPLNLYQFKNMIKCTVPSRS-WWDFADYGCFCGYGG  
Elapid\_Venom\_PLA2\_84 1 ?NPAQLLVLAAVCVPLLGASSIRPMPLNLYQFKNMIKCTVPSRS-WWDFADYGCFCGYGG  
Elapid\_Venom\_PLA2\_85 1 ?NPAQLLVLAAVCVSLLGASSIRPMPLNLYQFKNMIKCTVPSRS-WWDFADYGCFCGYGG  
Elapid\_Venom\_PLA2\_86 1 ?????????CVSLLGASSIRPMPLNLYQFKDMIKCTVPSRS-WWDFADYGCFCGYGG  
Elapid\_Venom\_PLA2\_87 1 ?????????GASSIRPMPLNLYQFKNMIKCTVPSRS-WWDFADYGCFCGYGG  
Elapid\_Venom\_PLA2\_88 1 ?????????RS-WWDFADYSCFCGYGG  
Elapid\_Venom\_PLA2\_89 1 MNPAQLLVLAAVCVSLLGASSIRPMPLNLYQFKNMIKCTVPSRS-WWDFADYGCFCGYGG  
Elapid\_Venom\_PLA2\_90 1 ?NPAQLLVLAAVCVSLLGASSIRPMPLNLYQFKNMIKCTVPSRS-WWDFADYGCFCGYGG



|                      |    |                                                              |
|----------------------|----|--------------------------------------------------------------|
| Elapid_Venom_PLA2_67 | 60 | SGTPVDDLDRCCQTHDNCYSEAEKLPSCTAYIKTYSYECSEGLTTCGGGNDECAAFVCNC |
| Elapid_Venom_PLA2_68 | 59 | SGTPVDDLDRCCQTHDNCYSEAEKLPSCTPYIKTYSYECSEGLTTCGGGNDECAAFVCNC |
| Elapid_Venom_PLA2_69 | 59 | SGTPVDDLDRCCQTHDNCYSEAEKLPSCTPYIKTYSYECSEGLTTCGGGNDECAAFVCNC |
| Elapid_Venom_PLA2_70 | 43 | SGTPVDDLDRCCQTHDNCYSEAEKLPSCTPYIKTYSYECSEGLTTCGGGNDECAAFVCNC |
| Elapid_Venom_PLA2_71 | 59 | SGTPVDDLDRCCQTHDNCYSEAEKLPSCTPHIKTYSYECSEGLTTCGGGNDECAAFVCNC |
| Elapid_Venom_PLA2_72 | 59 | SGTPVDDLDRCCQTHDNCYSGAEKLPSCTPYIKTYSYECSEGLTTCGGGNDECAAFVCNC |
| Elapid_Venom_PLA2_73 | 60 | SGTPVDDLDRCCQTHDNCYSGAEKLPSCTPYIKTYSYECSEGLTTCGGGNDECAAFVCNC |
| Elapid_Venom_PLA2_74 | 60 | SGTPVDDLDRCCQTHDNCYSEAEKLPSCTPYIKTYSYECSEGLTTCGGGNDECAAFVCNC |
| Elapid_Venom_PLA2_75 | 59 | SGTPVDDLDRCCQTHDNCYSEAEKLPSCTPYVKTYSYECSEGLTTCGGGNDECAAFVCNC |
| Elapid_Venom_PLA2_76 | 59 | SGTPVDDLDRCCQTHDNCYSEAEKLPSCTPYIKTYSYECSEGLTTCGGGNDECAAFVCNC |
| Elapid_Venom_PLA2_77 | 59 | SGTPVDDLDRCCQTHDNCYSEAEKLPSCTPYIKTYSYECSEGLTTCGGGNDECAAFVCNC |
| Elapid_Venom_PLA2_78 | 60 | SGTPVDDLDRCCQTHDNCYSEAEKLPSCTPYIKTYSYECSEGLTTCGGGNDECAAFVCNC |
| Elapid_Venom_PLA2_79 | 60 | SGTPVDDLDRCCQTHDNCYSEAEKLPSCTPYIKTYSYECSEGLTTCGGGNDECAAFVCNC |
| Elapid_Venom_PLA2_80 | 49 | SGTPVDDLDRCCQTHDNCYSEAEKLPSCTPYIKTYSYECSEGLTTCGGGNDECAAFVCNC |
| Elapid_Venom_PLA2_81 | 43 | SGTPVDDLDRCCQTHDNCYSEAEKLPSCTPYIKTYSYECSEGLTTCGGGNDECAAFVCNC |
| Elapid_Venom_PLA2_82 | 60 | SGTPVDDLDRCCQTHDNCYSEAEKLPSCTPYIKTYSYECSEGLTTCGGGNDECAAFVCNC |
| Elapid_Venom_PLA2_83 | 59 | SGTPVDDLDRCCQTHDNCYSEAEKLPSCTPYIKTYSYECSEGLTTCGGGNDECAAFVCNC |
| Elapid_Venom_PLA2_84 | 59 | SGTPVDDLDRCCQTHDNCYSEAEKLPSCTPYIKTYSYECSEGLTTCGGGNDECAAFVCNC |
| Elapid_Venom_PLA2_85 | 59 | SGTPVDDLDRCCQTHDNCYSEAEKLPSCTPYIKTYSYECSEGLTTCGGGNDECAAFVCNC |
| Elapid_Venom_PLA2_86 | 48 | SGTPVDDLDRCCQTHDNCYSEAEKLPSCTPYIKTYSYECSEGLTTCGGGNDECAAFVCNC |
| Elapid_Venom_PLA2_87 | 43 | SGTPVDDLDRCCQTHDNCYSEAEKLPSCTPYIKTYSYECSEGLTTCGGGNDECAAFVCNC |
| Elapid_Venom_PLA2_88 | 18 | SGTPVDDLDRCCQTHDNCYSEAEKLPSCTPYIKTYSYECSEGLTTCGGGNDECAAFVCNC |
| Elapid_Venom_PLA2_89 | 60 | SGTPVDDLDRCCQTHDNCYSEAEKLPSCTPYIKTYSYECSEGLTTCGGGNDECAAFVCNC |
| Elapid_Venom_PLA2_90 | 59 | SGTPVDDLDRCCQTHDNCYSVAEKLPSCTPYIKTYSYECSEGLTTCGGGNDECAAFVCNC |

|                      |     |                                  |
|----------------------|-----|----------------------------------|
| Elapid_Venom_PLA2_01 | 120 | DREAAICFAGAPYIKANKKIDTKERCQ*     |
| Elapid_Venom_PLA2_02 | 120 | DREAAICFAGAPYIKANKKIDTKERCQ?     |
| Elapid_Venom_PLA2_03 | 120 | DREAAICFAGAPYIKANKKIDTKERCQ*     |
| Elapid_Venom_PLA2_04 | 120 | DREAAICFAGAPYIKANKKIDTKERCQ*     |
| Elapid_Venom_PLA2_05 | 120 | DREAAICFAGAPYIKANKKIDAKERCQ*     |
| Elapid_Venom_PLA2_06 | 120 | DREAAICFAGAPYI[RANKKIDTKERCQ*    |
| Elapid_Venom_PLA2_07 | 120 | DREAAICFAGAPYIKANKKIDTKERCQ*     |
| Elapid_Venom_PLA2_08 | 120 | DREAAICFAGAPYIKANKKIDTKERCQ*     |
| Elapid_Venom_PLA2_09 | 120 | DREAAICFAGAPYIKANKKIDT[RERCQ*    |
| Elapid_Venom_PLA2_10 | 120 | DREAAICFAGAPYIKANKKIDTKERCQ?     |
| Elapid_Venom_PLA2_11 | 120 | DREAAICFAGAPYIKANKKIDTKERCQ*     |
| Elapid_Venom_PLA2_12 | 120 | DREAAICFAGAPYIKANKKIDTKERCQ*     |
| Elapid_Venom_PLA2_13 | 121 | DREAAICFAGAPYIKANKKIDTKERCQ*     |
| Elapid_Venom_PLA2_14 | 120 | DREAAICFAGAPYIKANKKIDTKERCQ*     |
| Elapid_Venom_PLA2_15 | 120 | DREAAICFAGAPYIKANKKIDTKERCQ*     |
| Elapid_Venom_PLA2_16 | 120 | DREAAICFAGAPYIKANKKIDTKERCQ*     |
| Elapid_Venom_PLA2_17 | 121 | DREAAICFAGAPYIKANKKIDTKERCQ*     |
| Elapid_Venom_PLA2_18 | 120 | DREAAICFAGAPYIKANKKIDTKERCQ*     |
| Elapid_Venom_PLA2_19 | 120 | DREAAICFAGAPYIKANKKIDTKERCQ*     |
| Elapid_Venom_PLA2_20 | 120 | DREAAICFAGAPYIKANKKIDTKERCQ*     |
| Elapid_Venom_PLA2_21 | 120 | DREAAIC[SAGAPYIKANKKIDTKERCQ*    |
| Elapid_Venom_PLA2_22 | 120 | DREAAICFAGAPYIKANKKIDTKERCQ*     |
| Elapid_Venom_PLA2_23 | 120 | DREAAICFAGAPYIKANKKIDTKERCQ*     |
| Elapid_Venom_PLA2_24 | 120 | DREAAICFAGAPYIKANKKIDT[RERCQ*    |
| Elapid_Venom_PLA2_25 | 120 | DREAAICFAGAPYIKANKKIDT[RERCQ*    |
| Elapid_Venom_PLA2_26 | 120 | DREAAIC[YAGAPYIKANKKIDTKERCQ*    |
| Elapid_Venom_PLA2_27 | 120 | DREAAICFAGAPYIKANKKIDTKERCQ?     |
| Elapid_Venom_PLA2_28 | 121 | DREAAICFAGAPYIKANKKIDTKERCQ*     |
| Elapid_Venom_PLA2_29 | 121 | DREA[TICFAGAPYIKANKKIDTKERCQ*    |
| Elapid_Venom_PLA2_30 | 104 | ???????????????????????????????? |
| Elapid_Venom_PLA2_31 | 96  | DREAAICFAGAPYIKANKKIDTKERCQ*     |
| Elapid_Venom_PLA2_32 | 120 | DREAAICFAGAPYIKANKKIDTKERCQ*     |
| Elapid_Venom_PLA2_33 | 120 | DREAAICFAGAPYIKANKKIDTKERCQ*     |
| Elapid_Venom_PLA2_34 | 104 | DREAAICFAGAPYIKANKKIDTKERCQ*     |
| Elapid_Venom_PLA2_35 | 121 | DREAAICFAGAPY[?????????????????  |
| Elapid_Venom_PLA2_36 | 120 | D[HEAAICFAGAPY[????????????????? |
| Elapid_Venom_PLA2_37 | 111 | DREAAICFAGAPYIKANKKIDTKERCQ*     |
| Elapid_Venom_PLA2_38 | 104 | D[CEAAICFAGAPY[????????????????? |
| Elapid_Venom_PLA2_39 | 104 | DREAAICFAGAPY[?????????????????  |
| Elapid_Venom_PLA2_40 | 104 | DREAAICFAGAPYIKANKKIDTKERCQ*     |
| Elapid_Venom_PLA2_41 | 104 | DREAAICFAGAPYIKANKKIDTKERCQ*     |
| Elapid_Venom_PLA2_42 | 104 | DREAAICFAGAPYIKANKKIDTKERCQ*     |
| Elapid_Venom_PLA2_43 | 104 | DREAAICFAGAPYIKANKKIDTKERCQ*     |
| Elapid_Venom_PLA2_44 | 104 | DREAAICFAGAPYIKANKKIDTKERCQ*     |
| Elapid_Venom_PLA2_45 | 104 | DR[GAAICFAGAPYIKANKKIDTKERCQ*    |
| Elapid_Venom_PLA2_46 | 104 | DREAAICFAGAPY[VANKKIDTKERCQ*     |
| Elapid_Venom_PLA2_47 | 104 | DREAAICFAGAPYIKANKKIDTKERCQ*     |
| Elapid_Venom_PLA2_48 | 104 | DREAAICFAGAPYIKANKKIDTKERCQ*     |
| Elapid_Venom_PLA2_49 | 104 | DREAAICFAGAPY[AANKKIDTKERCQ?     |
| Elapid_Venom_PLA2_50 | 104 | DREAAICFAGAPY[VANKKIDTKERCQ?     |
| Elapid_Venom_PLA2_51 | 104 | DREAAICFAGAPYIKAN[RKIDTKERCQ?    |
| Elapid_Venom_PLA2_52 | 104 | DREAAICFAGAPYIKANKKIDTKERCQ*     |
| Elapid_Venom_PLA2_53 | 104 | DREAAICFAGAPYIKANKKIDTKERCQ*     |
| Elapid_Venom_PLA2_54 | 104 | DREAAICFAGAPYIKANKKIDTKERCQ?     |
| Elapid_Venom_PLA2_55 | 104 | DREAAIC[LAGAPYIKANKKIDTKERCQ?    |
| Elapid_Venom_PLA2_56 | 104 | DREAAICFAGAPYIKANKKIDTKERCQ?     |
| Elapid_Venom_PLA2_57 | 104 | DREAAICFAGAPYIKANKKIDT[EERRQ?    |
| Elapid_Venom_PLA2_58 | 104 | DREAAICFAGAPYIKANKKIDTKERCQ?     |
| Elapid_Venom_PLA2_59 | 104 | DREAAIC[LAGAPYIKANKKIDTKERCQ?    |
| Elapid_Venom_PLA2_60 | 99  | DREAAICFAGAPYIKANKKIDTKERCQ?     |
| Elapid_Venom_PLA2_61 | 96  | DREAAICFAGAPYIKANKKIDTKERCQ?     |
| Elapid_Venom_PLA2_62 | 96  | DREAAICFAGAPYIKANKKIDTKERCQ?     |
| Elapid_Venom_PLA2_63 | 96  | DREAAICFAGAPYIKANKKIDTKERCQ*     |
| Elapid_Venom_PLA2_64 | 96  | DREA[TICFAGAPYIKANKKIDTKERCQ*    |
| Elapid_Venom_PLA2_65 | 120 | DR[VAAICFAGAPYINDNYNVNLKERCQ*    |
| Elapid_Venom_PLA2_66 | 121 | DREAAICFAGAPYINDNYNVNLKERCQ*     |

|                      |     |                                  |
|----------------------|-----|----------------------------------|
| Elapid_Venom_PLA2_67 | 120 | DRVAAICFAGAPYINDNCNVNLKERCQ*     |
| Elapid_Venom_PLA2_68 | 119 | DRVAAICFAGAPYINDNCNVNLKERCQ*     |
| Elapid_Venom_PLA2_69 | 119 | DRVAAICFAGAPYINDNCNVNLKERCQ*     |
| Elapid_Venom_PLA2_70 | 103 | DRVAAICFAGAPYINDDYNVNLKERCQ*     |
| Elapid_Venom_PLA2_71 | 119 | DRVAAICFAGAPYINDNYNVNLKERCQ*     |
| Elapid_Venom_PLA2_72 | 119 | DRVAAICFAGAPYINDNYNVNLKERCQ*     |
| Elapid_Venom_PLA2_73 | 120 | DRVAAICFAGAPYINDNYNVNLKERCQ*     |
| Elapid_Venom_PLA2_74 | 100 | ???????????????????????????????? |
| Elapid_Venom_PLA2_75 | 119 | DRVAAICFAGAPYINDNYNVNLKERCQ?     |
| Elapid_Venom_PLA2_76 | 119 | DRVAAICFAGAPYINDNYNVNLKERCQ*     |
| Elapid_Venom_PLA2_77 | 119 | DRVAAICFAGAPYINDNYNVNLKERCQ*     |
| Elapid_Venom_PLA2_78 | 120 | DRVAAICFAGAPYINDSYNVNLKERCQ*     |
| Elapid_Venom_PLA2_79 | 120 | DRVAAICFAGAPYINDNYNVNLKERCQ*     |
| Elapid_Venom_PLA2_80 | 109 | DRVAAICFAGAPYINDNYNVNLKERCQ*     |
| Elapid_Venom_PLA2_81 | 103 | DRVAAICFAGAPYINDNYNVNLKERCQ*     |
| Elapid_Venom_PLA2_82 | 120 | DRVAAICFAGAPYINDNYNVNLKERCQ*     |
| Elapid_Venom_PLA2_83 | 119 | DRVAAICFAGAPYINDNYNVNLKERCQ*     |
| Elapid_Venom_PLA2_84 | 119 | DRVAAICFAGAPYINDNYNVNLKERCQ*     |
| Elapid_Venom_PLA2_85 | 119 | DRVAAICFAGAPYINDN???????????     |
| Elapid_Venom_PLA2_86 | 108 | DRVAAICFAGAPYINDNYNVNLKERCQ*     |
| Elapid_Venom_PLA2_87 | 103 | DRVAAICFAGAPY?????????????????   |
| Elapid_Venom_PLA2_88 | 78  | DRVAAICFAGAPYINDNYNVNLKERCQ*     |
| Elapid_Venom_PLA2_89 | 120 | DRVAAICFAGAPYINNYNVNLKERCQ?      |
| Elapid_Venom_PLA2_90 | 119 | DRVAAICFAGAPYINNYNVNLKERCQ?      |

## (B) Kunitz-type serine protease inhibitors

```

Elapid_Venom_KSPI_01 1 SGHLLLLLGLLTLWAELTPVSGLGGPPEYCLLPADPGPCSNRYRYVYYNPALRKCEQFLYG
Elapid_Venom_KSPI_02 1 SGHLLLLLGLLTLWAELTPVSGLGGPPEYCLLPADPGPCSNRYRYVYYNPALRKCEQFLYG
Elapid_Venom_KSPI_03 1 SGHLLLLLGLLTLWAELTPVSGR--PGLCELPAASGLCNANIPAFYYNLAAKQCQKFIYG
Elapid_Venom_KSPI_04 1 SGHLLLLLGLLTLWAELTPVSGR--PGLCELPAASGLCNANIPAFHYNLAAKQCQKFIYG
Elapid_Venom_KSPI_05 1 SGHLLLQLGLLTLWAELTPVSGR--PGLCELPAASGLCNANIPAFYYNLAAKQCQKFIYG
Elapid_Venom_KSPI_06 1 SGHLLLLLGLLTLWAELTPVSGR--PGLCELPAASGLCNTNIPAFYYNLAAKQCQKFIYG
Elapid_Venom_KSPI_07 1 SGHLLLLLGLLTLWAELTPVSGR--PGLCELPAASGLCNTNIPAFYYNLAAKQCQKFIYG
Elapid_Venom_KSPI_08 1 SGHLLLLLGLLTLWAELTPVSGR--PGLCELPAASGLCNANIPAFYYNLAAKQCQKFIYG
Elapid_Venom_KSPI_09 1 SGHLLLLLGLLTLWAELTPASGR--PGLCELPAASGLCNANIPAFYYNLAAKQCQKFIYG
Elapid_Venom_KSPI_10 1 SGHLLLLLGLLTLWAELTPVSGR--PGLCELPAASGLCNANIPAFYYNLAAKQCQKFIYG
Elapid_Venom_KSPI_11 1 SGHLLLLLGLLTLWAELTPVSGR--PGLCELPAASGLCNANIPAFYYNLAAKQCQKFIYG
Elapid_Venom_KSPI_12 1 SGHLLLPLGLLTLWAELTPVSGR--PGLCELPAASGLCNANIPAFYYNLAAKQCQKFIYG
Elapid_Venom_KSPI_13 1 PGHLLLLLGLLTLWAELTPVSGR--PGLCELPAASGLCNANIPAFYYNLAAKQCQKFIYG
Elapid_Venom_KSPI_14 1 SGHLLLLLGLLTLWAELTPVSSR--PGLCELPAASGLCNANIPAFYYNLAAKQCQKFIYG
Elapid_Venom_KSPI_15 1 SGHLLLLLGLLTLWAELTPVSGR--PGLCELPAASGLCNANIPAFYYNLAAKQCQKFIYG
Elapid_Venom_KSPI_16 1 ??????????????????TPVSGR--PGLCELPAASGLCNANIPAFYYNLAAKQCQKFIYG

```

```

Elapid_Venom_KSPI_01 61 GCEGNKNNFKTRHECHRACVR?
Elapid_Venom_KSPI_02 61 GCEGNKNNFKTIDECRRTCAG?
Elapid_Venom_KSPI_03 59 GCGGNANRFKTIDECRRT*---
Elapid_Venom_KSPI_04 59 GCGGNANRFKTIDECRRT*---
Elapid_Venom_KSPI_05 59 GCGGNANRFKTIDECRRT*---
Elapid_Venom_KSPI_06 59 GCGGNANRFKTIDECRRT*---
Elapid_Venom_KSPI_07 59 GCGGNANRFKTIDECRRTCAG*
Elapid_Venom_KSPI_08 59 GCGGNANRFKTIDECRRTCAG*
Elapid_Venom_KSPI_09 59 GCGGNANRFKTIDECRRTCAG*
Elapid_Venom_KSPI_10 59 GCGGSANRFKTIDECRRTCAG*
Elapid_Venom_KSPI_11 59 GCGGNANRFKTIGECRRTCAG*
Elapid_Venom_KSPI_12 59 GCGGNANRFKTIDECRRTCAG*
Elapid_Venom_KSPI_13 59 GCGGNANRFKTIDECRRTCAG*
Elapid_Venom_KSPI_14 59 GCGGNANRFKTIDECRRTCAG*
Elapid_Venom_KSPI_15 59 GCGGNANRFKTIDECRRACAG*
Elapid_Venom_KSPI_16 42 GCGGNANRFKTIDECHRACVR*

```

## (C) C-type lectins

```
Elapid_Venom_CTL_01 1 MRRFLFVTLGLLVAFSLNGANGCC-CPRDWLPKNGFCYKVFNDRKNWDAETFCRKHKP
Elapid_Venom_CTL_02 1 MRRFLFVTLGLLVAFSLNGANGCC-CPRDWLPKNGFCYKVFNDRKNWDAETFCRKHKP
Elapid_Venom_CTL_03 1 MRRFLFVTLGLLVAFSLNGANGCC-CPRDWLPKNGFCYKVFNDRKNWDAETFCRKHKP
Elapid_Venom_CTL_04 1 MRRFLFVTLGLLVAFSLNGANGCC-CPRDWLPKNGFCYKVFNDRKNWDAETFCRKHKP
Elapid_Venom_CTL_05 1 MRRFLFVTLGLLVAFSLNGANGCC-CPRDWLPKNGFCYKVFNDRKNWDAETFCRKHKP
Elapid_Venom_CTL_06 1 MGRFLFVTLGLLVAFSLNGIGANLDCPSSWVSYNVSCYKLFKRMMTWNQAQTYCAEQQE
Elapid_Venom_CTL_07 1 MGRFLFVTLGLLVAFSLNGIGANLDCPSSWVSYNVSCYKLFKRMMTWNQAQTYCAEQQE
Elapid_Venom_CTL_08 1 MGRFLFVTLGLLVAFSLNGIGANLDCPSSWVSHNVSCYKLFKRMMTWNQAQTYCAEQQE
Elapid_Venom_CTL_09 1 MGRFLFVTLGLLVAFSLNGIGANLDCPSSWVSHNVSCYKLFKRMMTWNQAQTYCAEQQE
Elapid_Venom_CTL_10 1 MGRFLVSLGLLVAFSLNGIGADHHCPSDWHSFDKFCYKLIKWKWSWSDAEESCIQRQN
Elapid_Venom_CTL_11 1 MGRFLVSLGLLVAFSLNGIGADHHCPSDWHSFDKFCYKLIKWKWSWSDAEESCIQRQN
```

```
Elapid_Venom_CTL_01 60 GCHLASIHGSEESADLAEYVSDYLSNGGNVWIGLNDPQKQRNWQWTDTRSTNSYLTWKQGE
Elapid_Venom_CTL_02 60 GCHLASIHGSEESADLAEYASDYLSNGGNVWIGLNDPQKQRNWQWTDTRSTNSYLTWKQGE
Elapid_Venom_CTL_03 60 GCHLASIHGSEESADLAEYASDYLSNGGNVWIGLNDPQKQRNWQWTDTRSTNSYLTWKQGE
Elapid_Venom_CTL_04 60 GCHLASIHGSEESADLAEYASDYLSNGGNVWIGLNDPQKQRNWQWTDTRSTNSYLTWKQGE
Elapid_Venom_CTL_05 60 GCHLASIHGSEESADLAEYASDYLSNGGNVWIGLNDPQKQRNWQWTDTRSTNSYLTWKQGE
Elapid_Venom_CTL_06 61 NCQLASINEVGESVKSSDELSQRLEVL-DVWMGLS--KTKGNWKWSDGNSFTYTSWDEGE
Elapid_Venom_CTL_07 61 NCQLASINEVGESVKLSDELSQRLEVL-DVWMGLS--KTKGNWKWSDGNSFTYTSWDEGE
Elapid_Venom_CTL_08 61 NCQLASINEVGESVKLSDELSQRLEVL-DVWMGLS--KTKGNWKWSDGNSFTYTSWDEGE
Elapid_Venom_CTL_09 61 NCQLASINEVGESVKSSDELSQRLEVL-DVWMGLS--KTKGNWKWSDGNSFTYTSWDEGE
Elapid_Venom_CTL_10 61 SSHLVSIONWEESFNVKTVISRNLILFTNVWIGLNDPEKTRTRWRWSDDSKFDYTSWELRE
Elapid_Venom_CTL_11 61 SSHLVSIONWEESFNVKTVISRNLILFANVWIGLNDPEKTRTRWRWSDDSKFDYTSWELRE
```

```
Elapid_Venom_CTL_01 120 PNNLRNNENCVELLSPSGYKNWNDENCASTRAYLCKCRF*-----
Elapid_Venom_CTL_02 120 PNNLRNNENCVELLSPSGYKNWNDENCASTRAYLCKRRF*-----
Elapid_Venom_CTL_03 120 PNNLRNNENCVELLSPSGYKNWNNENCASTRAYLCKCRF*-----
Elapid_Venom_CTL_04 120 PNNLRNNENCVELLSPSGYKNWNDENCASTRAYLCKCRF*-----
Elapid_Venom_CTL_05 120 PNNLRNNENCVELLSPSGYENWNDENCASTRAYLCKCRF*-----
Elapid_Venom_CTL_06 118 PDNFLNNEFCAALSAQSRYLRWNDQNCMFLQPFVCKFKPKRSQPENE*
Elapid_Venom_CTL_07 118 PDNFLNNEFCAALSAQSRYLRWNDQNCMFLQPFVCKFKPKRSQPENE*
Elapid_Venom_CTL_08 118 PDNFLNNEFCAALSAQSRYLRWNDQNCMFLQPFVCKFKPKRSQPENE*
Elapid_Venom_CTL_09 118 PDNFLNNEFCAALSAQSRYLRWNDQNCMFLQPFVCKFKPKRSQPENE*
Elapid_Venom_CTL_10 121 PSNADDGKYCVQLSSSSRYLRWKTAKCESKNFFICKM*-----
Elapid_Venom_CTL_11 121 PGNADDGKYCVQLSSSSRYLRWKTAKCESKNFFICKM*-----
```



## (D) Snake venom metalloproteinases

Elapid\_Venom\_SVMP\_01 1 LERNKGLFSEDYTETHYAPDGREITTSPPVQDHCYYHGYIQNEDESSAVISACDGLKGFH  
Elapid\_Venom\_SVMP\_02 1 LERNKGLFSEDYTETHYAPDGREITTSPPVQDHCYYHGYIQNEDESSAVISACDGLKGFH  
Elapid\_Venom\_SVMP\_03 1 LERNKGLFSEDYTETHYAPDGREITTSPPVQDHCYYHGYIQNEDESSAVISACDGLKGFH  
Elapid\_Venom\_SVMP\_04 1 ?????????????????????????????????????????????????????????????YIQNEDESSAVISACDGLKGFH  
Elapid\_Venom\_SVMP\_05 1 ?????????????????????????????????????????????????????????????????????????????????????

Elapid\_Venom\_SVMP\_01 61 KHQGETYFIEPLKLESEAHAIYKDENVKEKEDETPQICGVAQTTWESDESIEKTSQLTNT  
Elapid\_Venom\_SVMP\_02 61 KHQGGTYFIEPLKLESEAHAIYKDENVKEKEDETPQICGVAQTTWESDESIEKTSQLTNT  
Elapid\_Venom\_SVMP\_03 61 KHQGETYFIEPLKLESEAHAIYKDENVKEKEDETPQICGVAQTTWESDESIEKTSQLTNT  
Elapid\_Venom\_SVMP\_04 23 KHQGETYFIEPLKLESEAHAIYKDENVKEKEDETPQICGVAQTTWESDESIEKTSQLTNT  
Elapid\_Venom\_SVMP\_05 1 ?????????????????????????????????????????????????????????????????????????????????????

Elapid\_Venom\_SVMP\_01 121 PEQNRYLQVKKYIEIYMVVDYKMYMNYKRDKSAIKKKVYEMVNTMYTWYIRINNYIVLIG  
Elapid\_Venom\_SVMP\_02 121 PEQNRYLQVKKYIEIYMVVDYKMYMNYKRDKSAIKKKVYEMVNTMYTWYIRINNYIVLIG  
Elapid\_Venom\_SVMP\_03 121 PEQNRYLQAKKYIEIYMVVDYKMYMNYKRDKSAIKKKVYEMANTMYTWYVRINNYIVLIG  
Elapid\_Venom\_SVMP\_04 83 PEQNRYLQVKKYIEIYMVVDYKMYMNYKRDKSAIKKKVYEMVNTMYTWYIRINNYIVLIG  
Elapid\_Venom\_SVMP\_05 1 ?????????????????????????????????????????????????????????????KKKVYEMANTMYTWYIRINNYIVLIG

Elapid\_Venom\_SVMP\_01 181 LEIWSNGDQIMHPAANITLDFGEWRENVLLPRKWNDNTQILTGINLLGNTVGYGYVGT  
Elapid\_Venom\_SVMP\_02 181 LEIWSNGDQIMHPAANITLDFGEWRENVLLPRKWNDNTQILTGINLLGNTVGYGYVGT  
Elapid\_Venom\_SVMP\_03 181 LEIWSNGDQIMHPAANITLDFGEWRENVLLPRKWNDNTQILTGINLLGNTVGYGYVGT  
Elapid\_Venom\_SVMP\_04 143 LEIWSNGDQIMHPAANITLDFGEWRENVLLPRKWNDNTQILTGINLLGNTVGYGYVGT  
Elapid\_Venom\_SVMP\_05 27 LEIWSNGDQIMHPAANITLDFGEWRENVLLPRKWNDNTQILTGINLLGNTVGYGYVGT

Elapid\_Venom\_SVMP\_01 241 LCGLATSAAVIQDFSKRTSMVATIMAHELGHNMGIHHDNDTCNCGANICIMSATIHDDPA  
Elapid\_Venom\_SVMP\_02 241 LCGLATSAAVIQDFSKRTSMVATIMAHELGHNMGIHHDNDTCNCGANICIMSATIHDDPA  
Elapid\_Venom\_SVMP\_03 241 LCGLATSAAVIQDFSKRTSMVATIMAHELGHNMGIHHDNDTCNCGANICIMSATIHDDPA  
Elapid\_Venom\_SVMP\_04 203 LCGLATSAAVIQDFSKRTSMVATIMAHELGHNMGIHHDNDTCNCGANICIMSATIHDDPA  
Elapid\_Venom\_SVMP\_05 87 LCGLATSAAVIQDFSKRTSMVATIMAHELGHNMGIHHDNDTCNCGANICIMSATIHDDPA

Elapid\_Venom\_SVMP\_01 301 FQFSSCSVQYQEFLLRERPQCILNKPLSTDIVSPPVCGNYLVEVGEECDGSPEDCQSA  
Elapid\_Venom\_SVMP\_02 301 FQFSSCSVQYQEFLLRERPQCILNKPLSTDIVSPPVCGNYLVEVGEECDGSPEDCQSA  
Elapid\_Venom\_SVMP\_03 301 FQFSSCSVQYQEFLLRERPQCILNKPLSTDIVSPPVCGNYLVEVGEECDGSPEDCQSA  
Elapid\_Venom\_SVMP\_04 263 FQFSSCSVQYQEFLLRERPQCILNKPLSTDIVSPPVCGNYLVEVGEECDGSPEDCQSA  
Elapid\_Venom\_SVMP\_05 147 FQFSSCSVQYQEFLLRERPQCILNKPLSTDIVSPPVCGNYLVEVGEECDGSPEDCQSA

Elapid\_Venom\_SVMP\_01 361 CCDAATCKLQQAQCDSEECCEKCKFKKAGAECREAKDDCDLPELCTGQSAECPTDRFQR  
Elapid\_Venom\_SVMP\_02 361 CCDAATCKLQQAQCDSEECCEKCKFKKAGAECREAKDDCDLPELCTGQSAECPTDRFQR  
Elapid\_Venom\_SVMP\_03 361 CCDAATCKLQQAQCDSEECCEKCKFKKAGAECREAKDDCDLPELCTGQSAECPTDRFQR  
Elapid\_Venom\_SVMP\_04 323 CCDAATCKLQQAQCDSEECCEKCKFKKAGAECREAKDDCDLPELCTGQSAECPTDRFQR  
Elapid\_Venom\_SVMP\_05 207 CCDAATCKLQQAQCDSEECCEKCKFKKAGAECREAKDDCDLPELCTGQSAECPTDRFQR

Elapid\_Venom\_SVMP\_01 421 NGHPCQNNQ  
Elapid\_Venom\_SVMP\_02 421 NGHPCQNNQ  
Elapid\_Venom\_SVMP\_03 421 NGHPCQNNQ  
Elapid\_Venom\_SVMP\_04 383 NGHPCQNNQ  
Elapid\_Venom\_SVMP\_05 267 NGHPCQNNQ
